# Supplementary material for: Summary of the DREAM8 Parameter Estimation Challenge: Toward Parameter Identification for Whole-Cell Models
Source: PubMed Central journal article supplement (PMC4447414; doi:10.1371/journal.pcbi.1004096), 2015-05-28
Supplement: pcbi.1004096.s001.pdf [file pcbi.1004096.s001.pdf]

**Table S1. Whole-Cell Model Quantitative Parameters.**

| Type                                        | Count |
|---------------------------------------------|-------|
| External stimuli value                      | 10    |
| Metabolite extracellular concentration      | 83    |
| Metabolite intracellular concentration      | 73    |
| Reaction turnover number                    | 434   |
| RNA half-life                               | 343   |
| RNA polymerase promoter binding probability | 335   |
| Transcription factor fold-change effect     | 30    |
| Other                                       | 154   |
