# Supplementary material for: Summary of the DREAM8 Parameter Estimation Challenge: Toward Parameter Identification for Whole-Cell Models
Source: PubMed Central journal article supplement (PMC4447414; doi:10.1371/journal.pcbi.1004096), 2015-05-28
Supplement: pcbi.1004096.s002.pdf [file pcbi.1004096.s002.pdf]

**Table S2. Unknown Mutant RNA Polymerase Promoter Binding Probabilities.** Empty entries indicate unmodified parameters.

| Transcription Unit | Genes     | RNA Polymerase-Promoter Binding Probability |        |
|--------------------|-----------|---------------------------------------------|--------|
|                    |           | Wild-Type                                   | Mutant |
| TU003              | MG005-009 | 0.0046                                      |        |
| TU012              | MG025     | 0.0037                                      | 0.0022 |
| TU028              | MG048     | 0.0011                                      |        |
| TU070              | MG113     | 0.0006                                      |        |
| TU184              | MG277     | 0.0085                                      | 0.0050 |
| TU209              | MG306     | 0.0010                                      |        |
| TU245              | MG344     | 0.0015                                      |        |
| TU272              | MG376     | 0.0022                                      |        |
| TU306              | MG428     | 0.0010                                      | 0.0002 |
| TU319              | MG448     | 0.0009                                      |        |
