# Supplementary material for: Summary of the DREAM8 Parameter Estimation Challenge: Toward Parameter Identification for Whole-Cell Models
Source: PubMed Central journal article supplement (PMC4447414; doi:10.1371/journal.pcbi.1004096), 2015-05-28
Supplement: pcbi.1004096.s003.pdf [file pcbi.1004096.s003.pdf]

**Table S3. Unknown Mutant RNA Half-lives.** Empty entries indicate unmodified parameters.

| Transcription Unit | Genes     | Half-life (s) |        |
|--------------------|-----------|---------------|--------|
|                    |           | Wild-Type     | Mutant |
| TU003              | MG005-009 | 209           | 203    |
| TU011              | MG022-024 | 245           |        |
| TU027              | MG046-047 | 170           | 97     |
| TU069              | MG111-112 | 187           | 89     |
| TU180              | MG270-272 | 401           |        |
| TU203              | MG299     | 174           |        |
| TU233              | MG330-333 | 253           |        |
| TU260              | MG357     | 216           |        |
| TU294              | MG407     | 282           |        |
| TU307              | MG429-431 | 219           |        |
