# Supplementary material for: Summary of the DREAM8 Parameter Estimation Challenge: Toward Parameter Identification for Whole-Cell Models
Source: PubMed Central journal article supplement (PMC4447414; doi:10.1371/journal.pcbi.1004096), 2015-05-28
Supplement: pcbi.1004096.s004.pdf [file pcbi.1004096.s004.pdf]

**Table S4. Unknown Mutant Reaction Turnover Numbers.** Empty entries indicate unmodified parameters.

| Name                           | Reaction                                               | $k_{cat}$ ( $s^{-1}$ ) |        |
|--------------------------------|--------------------------------------------------------|------------------------|--------|
|                                |                                                        | Wild-Type              | Mutant |
| Acetate kinase                 | $AcP + ADP \leftrightarrow Ac + ATP$                   | 100.59                 | 53.15  |
| Cytidylate kinase              | $ATP + CMP \leftrightarrow ADP + CDP$                  | 103.25                 | 8.00   |
| Enolase                        | $G2P \leftrightarrow H_2O + Pep$                       | 300.87                 | 573.46 |
| Fructose-bisphosphate aldolase | $Fdp \leftrightarrow DHAP + GAP$                       | 23.34                  | 26.06  |
| Glucose-6-phosphate isomerase  | $G6P \leftrightarrow F6P$                              | 1218.79                | 245.80 |
| Methionine adenosyltransferase | $ATP + H_2O + Met \rightarrow AdoMet + Pi + PPI$       | 0.11                   | 0.06   |
| Phosphotransacetylase          | $Ac-CoA + Pi \leftrightarrow AcP + CoA$                | 1620.91                | 146.41 |
| Pyruvate dehydrogenase         | $CoA + NAD + Pyr \leftrightarrow Ac-CoA + CO_2 + NADH$ | 1128.31                | 456.00 |
| Thiamine kinase                | $ATP + dTMP \leftrightarrow ADP + dTDP$                | 0.07                   |        |
| Triose-phosphate isomerase     | $DHAP \leftrightarrow GAP$                             | 816.67                 | 53.65  |
